1 **NGSpop: A desktop software that supports population studies by**  
2 **identifying sequence variations from next-generation sequencing data**

3 Short title: NGSpop, a desktop software for identifying sequence variations from next-  
4 generation sequencing data

5 Dong-Jun Lee<sup>1,\*</sup>, Taesoo Kwon<sup>2</sup>, Hye-Jin Lee<sup>1</sup>, Yun-Ho Oh<sup>1</sup>, Jin-Hyun Kim<sup>1</sup>, Tae-Ho Lee<sup>1</sup>

6

7 <sup>1</sup>Genomics Division, National Institute of Agricultural Science, Jeonju, Republic of Korea

8 <sup>2</sup>Corporate R&D Center, Cloud9, Cheongju-si, Republic of Korea

9 \* Corresponding author

10 E-mail: [leemos1004@gmail.com](mailto:leemos1004@gmail.com) (D-JL)

11

12

13 **Abstract**

14 Next-generation sequencing (NGS) is widely used in all areas of genetic research, such  
15 as for genetic disease diagnosis and breeding, and it can produce massive amounts of  
16 data. The identification of sequence variants is an important step when processing large  
17 NGS datasets; however, currently, the process is complicated, repetitive, and requires  
18 concentration, which can be taxing on the researcher. Therefore, to support researchers  
19 who are not familiar with bioinformatics in identifying sequence variations regularly from  
20 large datasets, we have developed a fully automated desktop software, NGSpop. NGSpop  
21 includes functionalities for all the variant calling and visualization procedures used when  
22 processing NGS data, such as quality control, mapping, filtering details, and variant  
23 calling. In the variant calling step, the user can select the GATK or DeepVariant algorithm

24 for variant calling. These algorithms can be executed using pre-set pipelines and options  
25 or customized with the user-specified options. NGSpop is implemented using JavaFX  
26 (version 1.8) and can thus be run on Unix like operating systems such as Ubuntu Linux  
27 (version 16.04, 18.0.4). Although there are several pipelines and visualization tools  
28 available for NGS data analysis, most integrated environments do not support batch  
29 processes; thus, variant detection cannot be automated for population-level studies. The  
30 NGSpop software, developed in this study, has an easy-to-use interface and helps in rapid  
31 analysis of multiple NGS data from population studies.

32

33

34

## 35 **Introduction**

36 Next-generation sequencing (NGS) is widely used in all areas of genetic research, such  
37 disease diagnosis and breeding, this is in part because it is a useful tool for the detection  
38 of sequence variations [1-3]. NGS technology was originally used to study individuals  
39 and small samples, but more recently, it has been used to study cohort-level populations.  
40 In a medical study, such as that by the Undiagnosed Diseases Network (UDN) showed  
41 that a genetic diagnosis with NGS is valid, even if the disease is undiagnosed [4].  
42 According to NGS, 21% were changed in therapy, 37% in diagnostic testing, and 36% in  
43 variant-specific genetic counseling. NGS has also been used to construct an ultra-high-  
44 density genetic map for the identification of molecular markers for agricultural research  
45 [5,6]. The research showed that a genetic breeding with NGS is a valid and reliable tool  
46 to develop useful characters. NGS produces a large amount of data, especially for studies

47 involving genetic diseases and breeding at the population level. The identification of  
48 sequence variants in these large datasets is one of the most important processing steps;  
49 however, currently, sequence variation detection is both complicated and repetitive.  
50 Genomics consortia, such as the 1000 genome project [7], provide shell scripts that  
51 implement a standard operation procedure (SOP) for variant detection, which helps to  
52 standardize the process (<https://github.com/ekg/1000G-integration>). However, most of  
53 the SOP shell scripts in use are difficult to understand and automate. There are several  
54 workflows and tools available that include quality control (QC), mapping and the calling,  
55 annotation, and visualization of variations. Some tools have too many functions, and  
56 consequently, they can be difficult to learn and often require official training. Furthermore,  
57 for some tools, the lack of tool integration, and the many options included in their  
58 functionality, can confuse the user and considering the available options can be time  
59 consuming. Many pipelines and workflows have been developed by commercial and  
60 open-source communities to support NGS data analysis. Pipelines such as the  
61 `ngs_backbone` [8] and GATK [9] provide simple commands to perform a complete NGS  
62 data analysis. Most pipelines offer only a command-line interface, and thus the user needs  
63 to be trained in Unix/Linux commands, shell scripts, or Python. It is difficult to automate  
64 variant detection in population-level studies. Galaxy [10] and the CLC genomics  
65 workbench [11] provide users with easy-to-use graphical user interfaces (GUIs).  
66 Although there are many pipelines and integrated environments for NGS data analysis,  
67 each has its own strengths and limitations (Table 1).

68

69 **Table 1. Comparison of the user-friendly graphic interfaces and functions of the**  
 70 **SNP analysis pipelines.**

| Analysis \ Name               | Annovar | Ngs_backbone | inGAP | Galaxy | CLC genomics workbench | NGSpop |
|-------------------------------|---------|--------------|-------|--------|------------------------|--------|
| Quality Control (QC)          |         | O            | O     | O      | O                      | O      |
| Read Mapping                  |         | O            | O     | O      | O                      | O      |
| Variant calling (GATK)        |         | O            | O     | O      | O                      | O      |
| Variant calling (DeepVariant) |         |              |       |        |                        | O      |
| Variant annotation            | O       |              |       | O      | O                      | O      |
| Visualization                 |         |              |       |        |                        | O      |
| Manual mode                   | O       | O            | O     |        | O                      | O      |
| Batch mode                    |         |              |       | O      | O                      | O      |

71

72

73 To support sequence variation detection in population-level genomics studies, we have  
 74 developed a desktop software, NGSpop. The software accepts multiple NGS datasets and  
 75 allows the user to select between the GATK or DeepVariant [12] calling algorithms. The  
 76 functionalities for variant detection include QC, mapping, filtering, variant calling, and  
 77 visualization. Moreover, NGSpop has two modes of action: a one-step mode that supports  
 78 batch identification of variants and a step-by-step mode in which the user can verify the  
 79 result of each step. When the user selects the one-step mode, NGSpop can be executed  
 80 using pre-set options to exclude the time-consuming steps. NGSpop can only be used  
 81 with Linux operating systems.

82

## 83 **Implementation**

84 NGSpop was implemented using JavaFX (version 1.8), and the tools employed within it  
85 were compiled on Ubuntu Linux (version 18.0.4). The GNU compiler collection version  
86 7.2.0, for Ubuntu Linux, was used as a C-language compiler.

87

## 88 **Tools used in the pipeline**

89 The tools included in NGSpop were carefully chosen according to the pipeline of the  
90 National Agricultural Biotechnology Information Center (NABIC, Republic of Korea;  
91 Fig. 1). NGS data need to be evaluated for QC, and for this purpose, NGSpop includes  
92 FastQC (version 0.11.5). Filtering and trimming of the NGS data is mandatory, depending  
93 on the sequence quality, and for this step, NGSpop employs Trimmomatic (version 0.36)  
94 [13]. After the QC step, sequence reads can be mapped in NGSpop against a reference  
95 genome using an alignment tool, such as BWA (version 0.7.16a) [14], and SAMtools [15]  
96 is used for file format conversion and indexing. Mate-pair information cannot be  
97 concordant with the sample library information and should be fixed. If sequence reads  
98 can be mapped to more than two loci, then the duplicate reads should be removed, and  
99 Picard (version 2.9.4) is used for this in NGSpop. For SNP/INDEL identification, the user  
100 can select SNP/INDEL identification algorithms from the Genome Analysis Toolkit  
101 (version 3.7.0) or DeepVariant (version 0.5.1). Currently, DeepVariant is only supported  
102 by the Linux operating system, and consequently, this system is required to run NGSpop.  
103 To annotate the identified SNP/INDELS, SnpEff is used (version 4.3q) [16]. The  
104 identified and annotated variants are visualized using JBrowse software (version 1.12.3)  
105 [17]. All the tools integrated into NGSpop are summarized in Table 2.

106 **Fig 1. NGS data analysis pipeline used in the NGSpop software.** The variant analysis  
107 protocol and tools are chosen according to the pipeline of the National Agricultural  
108 Biotechnology Information Center (NABIC, Republic of Korea).

109

110 **Table 2. Tools included in the NGSpop software**

| Step               | Tool                    | Version | Reference                                                                                                                               |
|--------------------|-------------------------|---------|-----------------------------------------------------------------------------------------------------------------------------------------|
| QC                 | FastQC                  | 0.11.5  | ( <a href="https://www.bioinformatics.babraham.ac.uk/projects/fastqc/">https://www.bioinformatics.babraham.ac.uk/projects/fastqc/</a> ) |
|                    | Trimmomatic             | 0.36    | [13]                                                                                                                                    |
| Alignment          | BWA                     | 0.7.16a | [14]                                                                                                                                    |
| Post-processing    | Samtools                | 0.1.18  | [15]                                                                                                                                    |
|                    | Picard                  | 2.9.4   | ( <a href="http://broadinstitute.github.io/picard/">http://broadinstitute.github.io/picard/</a> )                                       |
|                    | BamTools                | 2.4.2   | [21]                                                                                                                                    |
| Variant calling    | GATK (IndelRealigner)   | 3.7.0   | [9]                                                                                                                                     |
|                    | GATK (HaplotypeCaller)  | 3.7.0   | [9]                                                                                                                                     |
|                    | GATK (UnifiedGenotyper) | 3.7.0   | [9]                                                                                                                                     |
|                    | DeepVariant             | 0.5.1   | [12]                                                                                                                                    |
| Variant annotation | SnEff                   | 4.3q    | [16]                                                                                                                                    |
| Visualization      | Jbrowser                | 1.12.3  | [17]                                                                                                                                    |

111 The tools are listed in the order of their use in the pipeline.

112

## 113 **Project creation and importing input files**

114 The user must create a project and specify the data files, including fastq files of  
115 sequencing reads and a reference file in the FASTA format (Suppl. 2a). Fastq files of the  
116 sequencing reads can be multiple pairs of forward and reverse reads for population studies.  
117 Only fastq files produced by the Illumina platform can be processed using NGSpop. For  
118 the convenience of users, NGSpop can download a reference file from a genomic database  
119 such as the NCBI, Ensemble, and the NABIC server through the application program

120 interface. When the index file of the reference sequence does not exist, NGSpop performs  
121 indexing of the reference file.

122

### 123 **Step-by-step mode**

124 NGSpop provides the user with a step-by-step mode, in which they can investigate each  
125 step of the analysis. The user can change or execute each option during each step, and  
126 changes will become the default options for the same step in each subsequent run (Suppl.  
127 2b). To monitor the progress of each step, NGSpop provides the user with a log window.

128

### 129 **One-step mode**

130 To automate NGS data analysis and support the largescale identification of variants,  
131 NGSpop provides a one-step user mode that can run all processes employed by NGSpop  
132 with a single click. When NGSpop runs using the one-step mode, the default options will  
133 be used for each step. The user can customize the default options used in the one-step  
134 mode by first using the step-by-step mode.

135

### 136 **Quality control**

137 To identify highly accurate genomic variation information from the population, the  
138 quality of the NGS data should be carefully checked and filtered; FastQC (version 0.11.5)  
139 is used for this purpose in NGSpop. Sequence reads that are below the score (Phred) [18]  
140 specified by the user will be filtered out and low-quality regions at the 5'- and 3'-ends can  
141 be trimmed using Trimmomatic (version 0.36) [13].

142

## 143 **Read mapping and duplicate removal**

144 NGSpop employs BWA (version 0.7.16a) [14] as a mapping tool for the NGS reads. To  
145 convert the BWA sequence alignment map format (sam) to a binary alignment map (bam)  
146 format, and then to sort and index the file, NGSpop uses SAMtools [15]. If the mate-pair  
147 information is not concordant with the sample library information, it should be verified  
148 and fixed. For this purpose, the Fixmate command of Picard (version 2.9.4) is used in  
149 NGSpop. In addition, duplicate reads are removed using the MarkDuplicates and  
150 AddOrReplaceReadGroups commands of Picard, and to calculate the statistics of the  
151 sequence reads, BamTools [19] is used.

152

## 153 **SNP/INDEL identification**

154 Using NGSpop, the user can select a SNP/INDEL identification algorithm from the  
155 Genome Analysis Toolkit (version 3.7.0) or DeepVariant (version 0.5.1). The Genome  
156 Analysis Toolkit (version 3.7.0) [9] is a standard tool for single nucleotide polymorphism  
157 (SNP)/INDEL identification from NGS data. To realign the reads around the INDELS,  
158 NGSpop, uses the RealignerTargetCreator and IndelRealigner commands of GATK.  
159 After the realignment of the reads, UnifiedGenotyper is used as a variant caller in  
160 NGSpop.

161

## 162 **DeepVariant**



163 DeepVariant is a variant caller developed by Google Inc. The tool showed overwhelming  
164 quality and imputation reference performance compared to well-established pipelines  
165 such as GATK [20]. NGSpop includes DeepVariant in its pipeline, and the user can select  
166 between the GATK or DeepVariant algorithms. DeepVariant is a deep learning-based  
167 variant caller that uses aligned reads (in BAM or CRAM format) to produce pileup image  
168 tensors, and each tensor is classified using a convolutional neural network, and finally  
169 reports the results in a standard VCF or gVCF file. DeepVariant supports germline variant  
170 calling in diploid organisms.

171

## 172 **Variant merge**

173 Vcf files that are produced using the GATK or DeepVariant algorithms in the same  
174 project will be merged in NGSpop. The vcf-merge script in VCFtools [20] is employed  
175 to integrate the vcf files. VCF tools are a program package of perl modules and C++  
176 programs.

177

## 178 **Variant annotation**

179 Variations in the nucleotides can change the amino acids of the genes and thus affect the  
180 organism. Therefore, the functional effects of these variants on the genes should be  
181 predicted. To annotate the identified variants, NGSpop uses SnpEff (version 4.3q) [16].  
182 In this study, NGSpop only included the *Arabidopsis thaliana* database (TAIR10 genome  
183 [22]) for SnpEff. In other studies, the SnpEff database should be included for the

184 appropriate organism if it is available. If there is no available database for non-model  
185 organisms, the database should be generated manually.

186

## 187 **Variant visualization**

188 The annotated variant information can be visualized using JBrowse (version 1.12.3; Fig.  
189 2) [17] in NGSpop. There are four feature tracks in the JBrowse window: reference  
190 sequence, annotation information of the reference in GFF, mapped reads in bam format,  
191 and annotated variants. The tracks can be shown or hidden by clicking the check box of  
192 the corresponding feature tracks that the user wants to investigate. The annotated variant  
193 file can be downloaded by clicking the VCF file download button on the top right of the  
194 JBrowse.

195

196 **Fig 2. Visualization of variants.** Four feature tracks are listed on the left panel of the  
197 JBrowse: reference sequence, annotation information of reference in GFF, mapped  
198 reads, and annotated variants. Only a .vcf file can be displayed in the JBrowse when  
199 multiple NGS data are selected for variant analysis after the merging of multiple .vcf  
200 files.

201

202

## 203 **Results and discussion**

204 The aim of NGSpop is to provide users with an easy-to-use environment for NGS data  
205 analysis, regardless of whether the user is an expert in bioinformatics. To this end,

206 NGSpop provides users with two modes: a step-by-step mode for beginners and a one-  
207 step mode for experts. There are currently many workflows and easy-to-use tools  
208 available for NGS analysis, but as the user is required to run each step manually and wait  
209 until each step ends before proceeding, they can slow the rate of analysis. Furthermore,  
210 these tools were not designed for population studies, and they only provide users with a  
211 step-by-step mode or a difficult hierarchical workflow design. Some tools do provide  
212 user-bash script interfaces, but these can be difficult to learn. However, when using  
213 NGSpop, only a single click of the run button is required and the results can be visualized  
214 using JBrowse. Even though the software provides a user graphic interface, NGSpop  
215 accepts multiple pairs of fastq files to support population-level studies. Thereby, users  
216 can identify variants in large scale datasets from population studies using only their  
217 personal computers (PCs) or workstations. Moreover, NGSpop provides a selection of  
218 variant calling algorithms from GATK and DeepVariant in the variant calling steps.  
219 Variant calling is an important step in NGS data analysis and genetic studies. There are  
220 many tools that identify high-quality and reliable variants from NGS data, but none of  
221 them can identify all variants. Therefore, researchers have used and combined multiple  
222 tools to identify variants from NGS data. To assess the coverage of the variants identified,  
223 we compared the variant calls from GATK and DeepVariant when using NGSpop. For  
224 the benchmark test, we generated a total of five test datasets using the complete  
225 *Arabidopsis thaliana* genome sequencing data from the DNA Data Bank of Japan (DDBJ)  
226 FTP site under the accession number SRR519473 (paired-end run with 52,154,720 reads  
227 and 10,430,944,000 bp) [24]. The sequencing data were generated by the *Arabidopsis*  
228 *thaliana* 1001 genome project (<http://1001genomes.org>) [23] using the Illumina HiSeq

229 2000 platform. The detailed specifications of the benchmark system and benchmark  
 230 results are summarized in Table 3. NGSpop took a total of 2 h 46 m 46 s to go from the  
 231 raw reads to variant annotation or visualization for the five test datasets using GATK,  
 232 whereas it took 1 h 48 min 00 s when using DeepVariant. A total of 113,163 variants  
 233 were identified using GATK, and 128,530 variants were identified using DeepVariant.  
 234 Among the identified variants, 111,918 overlapped between GATK and DeepVariant.  
 235 Meanwhile, 1,245 and 16,612 were specific to GATK and DeepVariant, respectively.  
 236 DeepVariant with Tensorflow was faster than GATK in variant calls and identified more  
 237 variants than GATK. Consequently, NGSpop was found to be an easy-to-use platform for  
 238 variant calling using GATK and DeepVariant.

239

240 **Table 3. Comparison of the variant calling algorithms used in the NGSpop software.**

| Benchmark Machine                                         |                 |                     |                 | Dataset | Variant calling algorithms |                    |              |               |                    |
|-----------------------------------------------------------|-----------------|---------------------|-----------------|---------|----------------------------|--------------------|--------------|---------------|--------------------|
| CPU                                                       | RAM<br>(GBytes) | Storage<br>(TBytes) | OS              |         | GATK                       |                    | Intersection | DeepVariant   |                    |
|                                                           |                 |                     |                 |         | SNP<br>Count               | Time<br>(hh:mm:ss) |              | SNP<br>Counts | Time<br>(hh:mm:ss) |
| Intel(R)<br>Xeon(R)<br>CPU E5-<br>2609 v3<br>@<br>1.90GHz | 32              | 1.8                 | Ubuntu<br>18.04 | 1       | 20,896                     | 0:32:15            | 20,671       | 23,761        | 0:21:19            |
|                                                           |                 |                     |                 | 2       | 20,404                     | 0:32:24            | 20,201       | 23,207        | 0:20:04            |
|                                                           |                 |                     |                 | 3       | 22,952                     | 0:33:02            | 22,705       | 26,087        | 0:21:38            |
|                                                           |                 |                     |                 | 4       | 24,616                     | 0:35:11            | 24,338       | 27,920        | 0:22:35            |
|                                                           |                 |                     |                 | 5       | 24,295                     | 0:33:54            | 24,003       | 27,555        | 0:22:24            |
|                                                           |                 |                     |                 | Sum     | 113,163                    | 2:46:46            | 111,918      | 128,530       | 1:48:00            |
| Average                                                   |                 |                     |                 | 22,633  | 0:33:21                    | 22,384             | 25,706       | 0:21:36       |                    |

241 Benchmark tests were performed for NGSpop using GATK and DeepVariant as the  
 242 variant calling algorithms.

243

244

## 245 **Conclusions**

246 Large-scale parallel sequencing has become a popular tool to identify sequence variations,  
247 and many tools have now been developed to analyze NGS data. Although many tools  
248 have been developed, few support population-level or cohort-level sequencing data.  
249 Owing to the lack of population-level analysis tools, many researchers find it difficult to  
250 analyze the massive volumes of NGS data that they produce. Researchers should ideally  
251 write scripts to analyze NGS data on the Linux command line. NGSpop is a user-friendly  
252 software for researchers who are not familiar with the command line interface and do not  
253 want to write shell scripts. Therefore, NGSpop provides the user with an easy-to-use  
254 interface and helps to automate the detection of variations from the NGS data at the  
255 population level. NGSpop helps genomics researchers who want to analyze population-  
256 level NGS data with an easy-to-use GUI. We developed NGSpop to support population-  
257 level NGS data analysis; however, there are some limitations. First of all, NGSpop only  
258 accepts FASTQ format data that has been produced using Illumina platform because there  
259 are too many parameters to consider when analyzing all types of NGS platforms. Next,  
260 NGSpop only supports Linux operating system because DeepVariant, one of the variant  
261 calling algorithms, can only be used with Linux operating systems. In future studies, we  
262 will include functionalities that support NGS platforms other than Illumina while  
263 accounting for the variations in formats.

264

## 265 **Availability and requirements**

266 **Project name:** NGSpop

267 **Project home page:** <https://sourceforge.net/projects/ngspop/>

268 **Operating system(s):** Linux

269 **Programming language:** JavaFX

270 **Other requirements:** All Perl libraries are listed in the Supplementary information.

271 **License:** GNU General Public License

272 **Any restrictions to use by non-academics:** license needed

273

274

275

276

## 277 **Availability of data and materials**

278 **Test datasets:** The test datasets used as the whole-genome shotgun sequencing data are

279 available from the project home page. (<https://sourceforge.net/projects/ngspop/>).

280

281

## 282 **Acknowledgements**

283 Not applicable

284

## 285 **References**

286 1. Ng SB, Turner EH, Robertson PD, Flygare SD, Bigham AW, Lee C, et al. Targeted  
287 capture and massively parallel sequencing of 12 human exomes. *Nature*.  
288 2009;461(7261): 272-276.

289 2. Ng SB, Buckingham KJ, Lee C, Bigham AW, Tabor HK, Dent KM, et al. Exome  
290 sequencing identifies the cause of a Mendelian disorder. *Nat Genet*. 2010;42(1):  
291 30-35.

292 3. Ng SB, Bigham AW, Buckingham KJ, Hannibal MC, McMillin MJ, Gildersleeve HI,  
293 et al. Exome sequencing identifies MLL2 mutations as a cause of Kabuki  
294 syndrome. *Nat Genet*. 2010;42(9): 790-793.

- 295 4. Splinter K, Adams DR, Bacino CA, Bellen HJ, Bernstein JA, Cheattle-Jarvela AM, et  
296 al. Effect of genetic diagnosis on patients with previously undiagnosed disease. *N*  
297 *Engl J Med*. 2018;379(22): 2131-2139.
- 298 5. Yu H, Xie W, Wang J, Xing Y, Xu C, Li X, et al. Gains in QTL detection using an  
299 ultra-high density SNP map based on population sequencing relative to traditional  
300 RFLP/SSR markers. *PLOS ONE*. 2011;6(3): e17595.
- 301 6. Schaeffer LR. Strategy for applying genome-wide selection in dairy cattle. *J Anim*  
302 *Breed Genet*. 2006;123(4): 218-223.
- 303 7. 1000 Genomes Project Consortium, Abecasis GR, Altshuler D, Auton A, Brooks LD,  
304 Durbin RM, et al. A map of human genome variation from population-scale  
305 sequencing. *Nature*. 2010;467(7319): 1061-1073
- 306 8. Blanca JM, Pascual L, Ziarsolo P, Nuez F, Cañizares J. *ngs\_backbone*: a pipeline for  
307 read cleaning, mapping and SNP calling using next generation sequence. *BMC*  
308 *Genomics*. 2011;12: 285.
- 309 9. McKenna A, Hanna M, Banks E, Sivachenko A, Cibulskis K, Kernytsky A, et al. The  
310 genome analysis toolkit: a MapReduce framework for analyzing next-generation  
311 DNA sequencing data. *Genome Res*. 2010;20(9): 1297-1303.
- 312 10. Goecks J, Nekrutenko A, Taylor J. Galaxy Team. Galaxy: a comprehensive approach  
313 for supporting accessible, reproducible, and transparent computational research in  
314 the life sciences. *Genome Biol*. 2010;11(8): R86.
- 315 11. Liu CH, Di YP. Analysis of RNA sequencing data using CLC genomics workbench.  
316 *Methods Mol Biol*. 2020;2102: 61-113.
- 317 12. Ryan Poplin, Pi-Chuan Chang, David Alexander, Scott Schwartz, Thomas Colthurst,  
318 Alexander Ku, et al. A universal SNP and small-indel variant caller using deep  
319 neural networks. *Nat Biotechnol*. 2018;36(10): 983-987.
- 320 13. Bolger AM, Lohse M, Usadel B. Trimmomatic: a flexible trimmer for Illumina  
321 sequence data. *Bioinformatics*. 2014;30(15): 2114-2120.
- 322 14. Li H, Durbin R. Fast and accurate short read alignment with Burrows-Wheeler  
323 transform. *Bioinformatics*. 2009;25(14): 1754-1760.
- 324 15. Li H. A statistical framework for SNP calling, mutation discovery, association  
325 mapping and population genetical parameter estimation from sequencing data.  
326 *Bioinformatics*. 2011;27(21): 2987-2993.
- 327 16. Cingolani P, Platts A, Wang LL, Coon M, Nguyen T, Wang L, et al. A program for  
328 annotating and predicting the effects of single nucleotide polymorphisms, SnpEff:  
329 SNPs in the genome of *Drosophila melanogaster* strain w1118; iso-2; iso-3. *Fly*.  
330 2012;6(2): 80-92.
- 331 17. Skinner ME, Uzilov AV, Stein LD, Mungall CJ, Holmes IH. JBrowse: a next-  
332 generation genome browser. *Genome Res*. 2009;19(9): 1630-1638.
- 333 18. Nowrousian M. Next-generation sequencing techniques for eukaryotic  
334 microorganisms: sequencing-based solutions to biological problems. *Eukaryot*  
335 *Cell*. 2010;9(9): 1300-1310.
- 336 19. Ewing B, Green P. Base-calling of automated sequencer traces using Phred. II. Error  
337 probabilities. *Genome Res*. 1998;8(3): 186-194.
- 338 20. Yun T, Li H, Chang PC, Lin MF, Carroll A, McLean CY. Accurate, scalable cohort  
339 variant calls using DeepVariant and GLnexus. *Bioinformatics* 2021;36(24): 5582-  
340 5589.

- 341 21. Barnett DW, Garrison EK, Quinlan AR, Strömberg MP, Marth GT. BamTools: a C++  
342 API and toolkit for analyzing and managing BAM files. *Bioinformatics*.  
343 2011;27(12): 1691-1692.
- 344 22. Danecek P, Auton A, Abecasis G, Albers CA, Banks E, DePristo MA, et al. The  
345 variant call format and VCFtools. *Bioinformatics* 2011;27(15): 2156-2158.
- 346 23. Swarbreck D, Wilks C, Lamesch P, Berardini TZ, Garcia-Hernandez M, Foerster H,  
347 et al. The Arabidopsis Information Resource (TAIR): gene structure and function  
348 annotation. *Nucleic Acids Res.* 2008;36: D1009-D1014.
- 349 24. Long Q, Rabanal FA, Meng D, Huber CD, Farlow A, Platzer A, et al. Massive  
350 genomic variation and strong selection in *Arabidopsis thaliana* lines from Sweden.  
351 *Nat Genet.* 2013;45(8): 884-890.

352

353

354

355

356

357

358

## 359 **Supporting information**

360 **Additional file 1. Supplementary.docx**

361



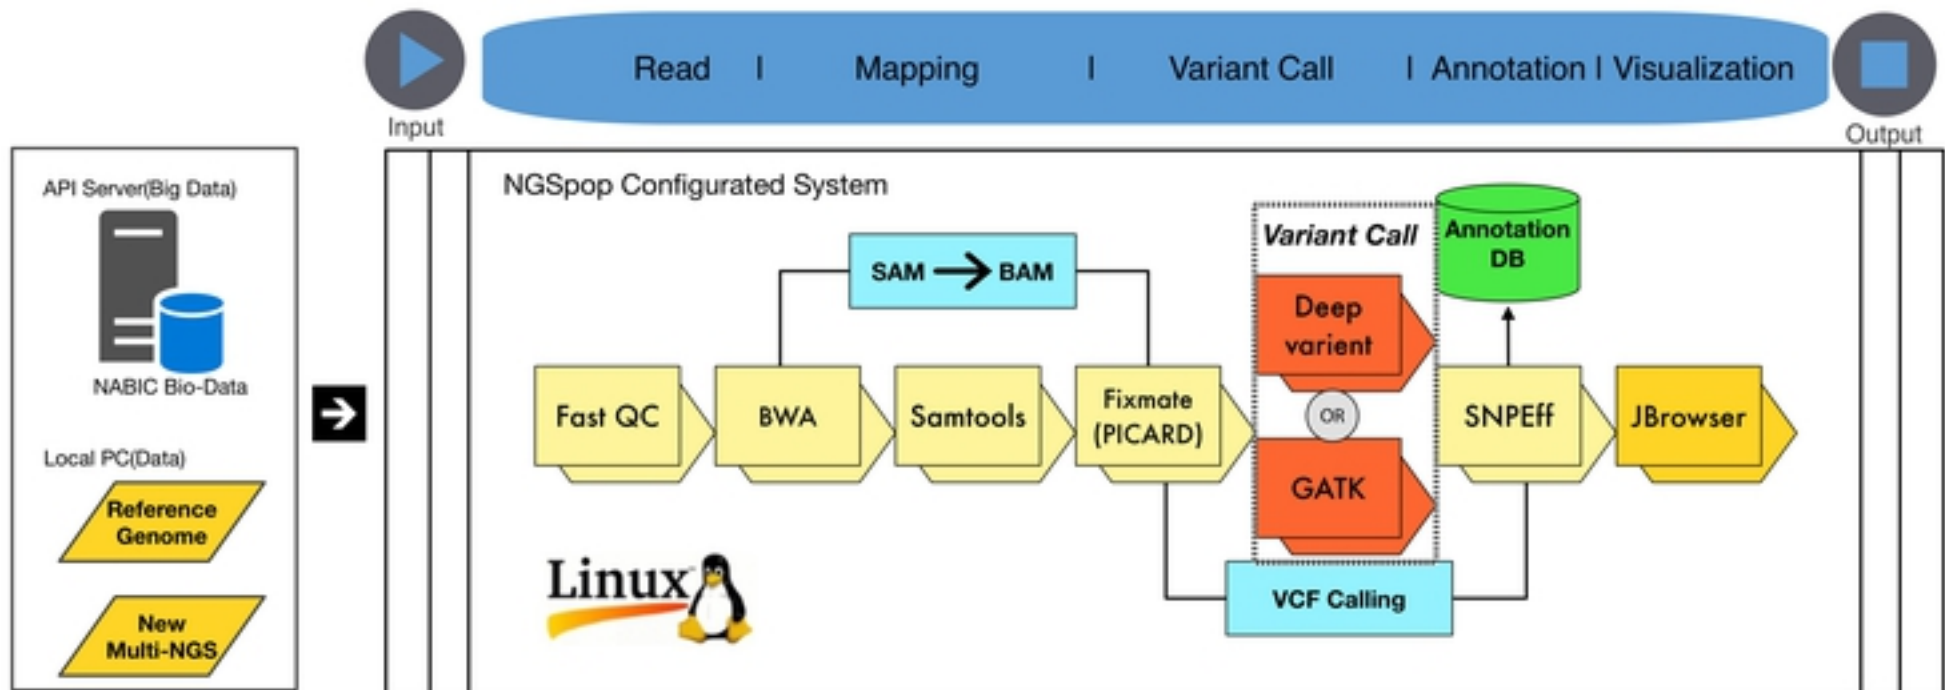

Figure 1

FastQC

Trimmomatic

BWA

Samtools

Fixmate

Filter

Remove  
duplicates

Variant Call

SNPEff

JBrowse

## One Step Analysis

JBrowse FastQc View SNPEff View one Step Log

VCF FILE DownLo...

## Available Tracks

X filter tracks

 gtf

NGS #&lt; category for this track

 BAM alignments from sample XYZ

Reference sequence

 Reference sequence

VCF

 VCF - additional test data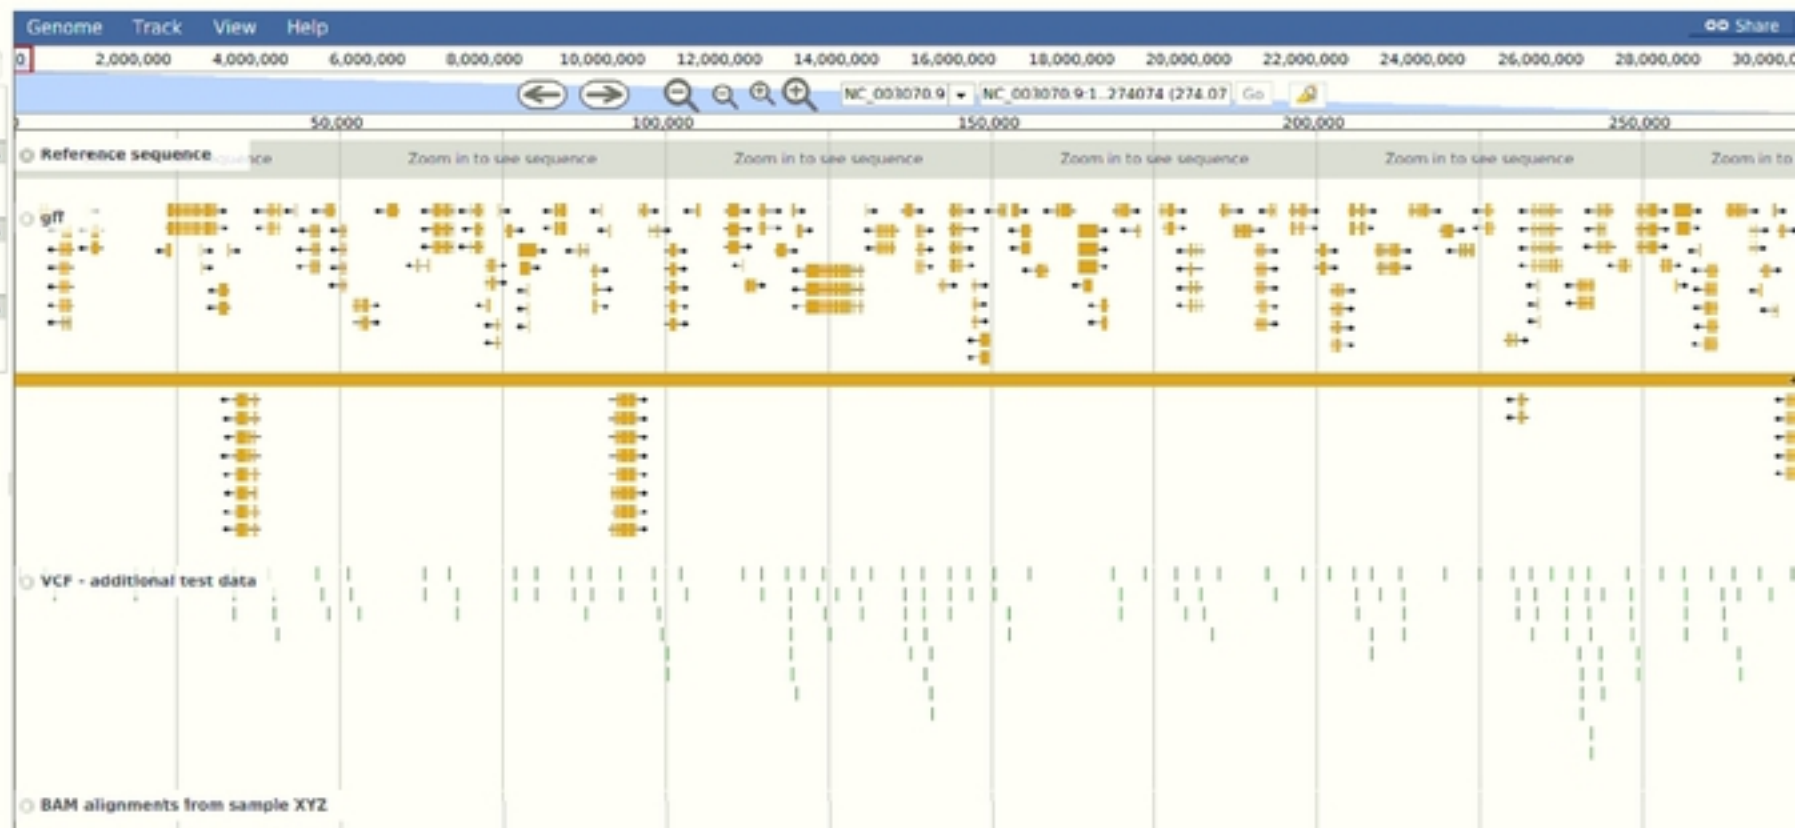

Figure2
